# Supplementary material for: Hierarchical differentiation competence in response to retinoic acid ensures stem cell maintenance during mouse spermatogenesis
Source: PubMed Central journal article supplement (PMC4419276; doi:10.1242/dev.118695), 2015-05-01
Supplement: supp_dev.118695_DEV118695supp.pdf [file supp_dev.118695_DEV118695supp.pdf]

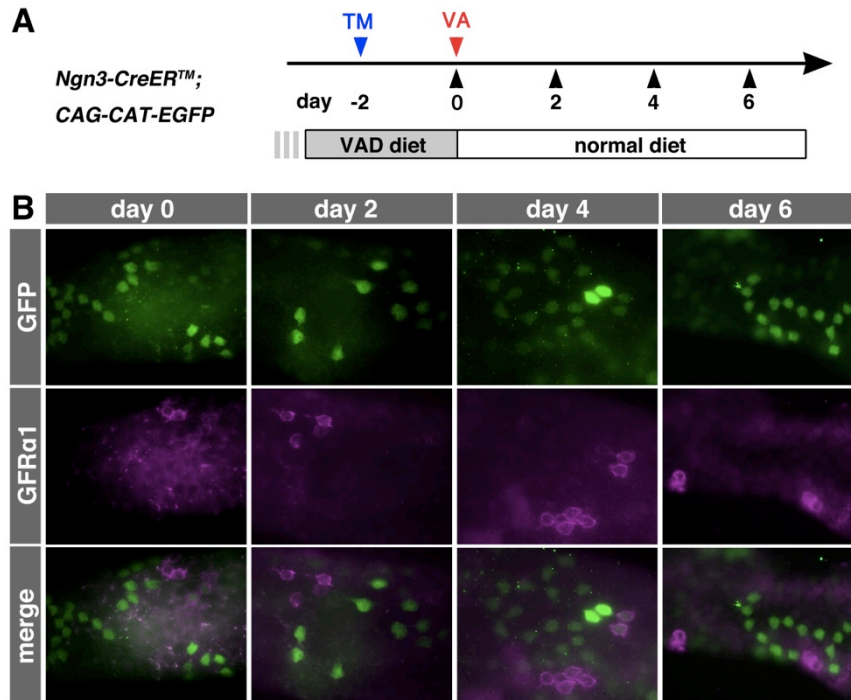

**Fig. S1. Cell fate analyses of VAD model mice (related to Fig. 2).** Fate of pulse-labeled NGN3+ cells following VA administration. The same protocol was used as in Fig. 2A. (A) The experimental schedule. (B) Representative images of the immunofluorescence (IF) of whole-mount seminiferous tubules 0, 2, 4, and 6 days after VA injection. GFP (green), GFR $\alpha$ 1 (magenta). Scale bar = 50  $\mu$ m.

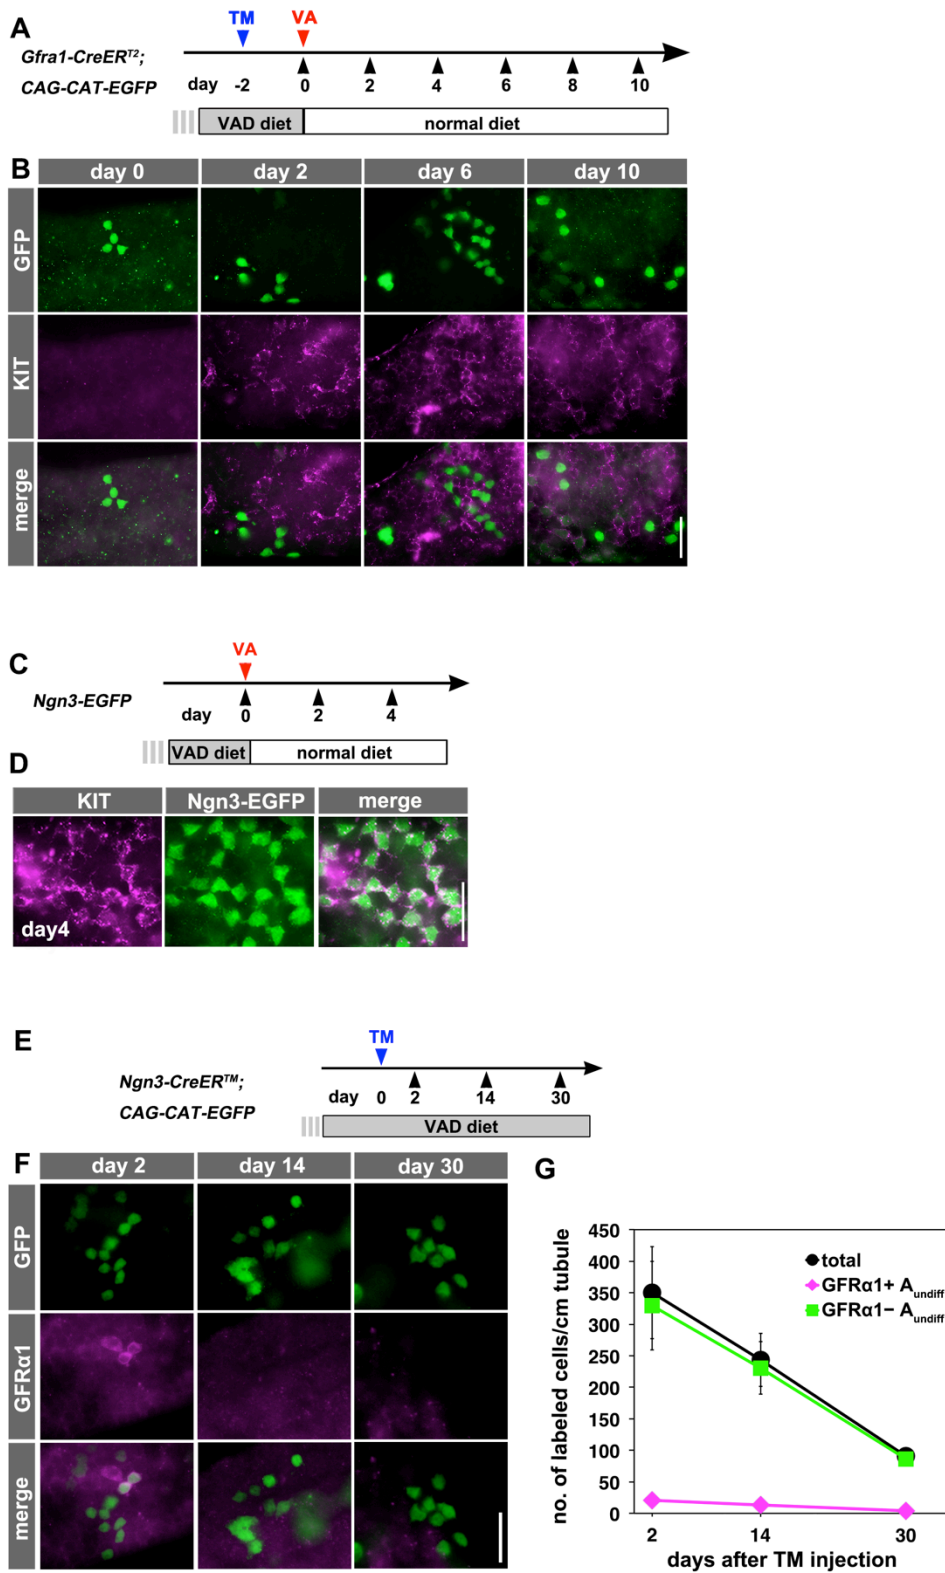

**Fig. S2. Cell fate analyses of VAD models (Related to Fig. 3).** (A and B) Fate of pulse-labeled  $GFR\alpha1+$  cells following VA administration, performed in the same experiment shown in Fig. 3A–C. (A) The experimental schedule. (B) IF analysis of GFP (green) and KIT (magenta) expression in whole-mount seminiferous tubules 0, 2, 6, and 10 days after VA injection. (C and D) The origin of  $KIT+$  spermatogonia in *Ngn3-EGFP* mice. In these mice,  $NGN3+$  cells can be traced short-term according to half-life of the residual GFP of approximately 2–3 days. (C) The experimental schedule. Before and after VA injection, the testes samples were harvested at the indicated times. (D) IF for KIT (magenta) and GFP (green) in whole-mount seminiferous tubule of *Ngn3-EGFP* mouse 4 days after VA administration. Virtually all of the  $KIT+$  cells were positive for residual GFP (mean  $\pm$  s.e.m. values for three animals were  $99.0 \pm 0.2\%$  and  $99.2 \pm 0.3\%$  on days 2 and 4, respectively), indicating that essentially all  $KIT+$  cells were derived from  $NGN3+$  cells. (E to G) Fate of pulse-labeled  $NGN3+$  spermatogonia in *Ngn3-CreER<sup>TM</sup>; CAG-CAT-EGFP* mice under conditions of persistent VAD. (E) The experimental schedule for (F) and (G). After a 4-hydroxytamoxifen (TM) pulse, *Ngn3-CreER<sup>TM</sup>; CAG-CAT-EGFP* mice were continually fed the VAD diet, and the testes samples were harvested at the indicated time points. (F) IF images of whole-mount seminiferous tubule at 2, 14, and 30 days after incubation with antibodies against GFP (green) and  $GFR\alpha1$  (magenta). (G) Number of labeled  $GFR\alpha1+$   $A_{undiff}$  (magenta),  $GFR\alpha1-$   $A_{undiff}$  (green), and total (black) cells in testes of *Ngn3-CreER<sup>TM</sup>; CAG-CAT-EGFP* mice following the schedule in (E). Mean  $\pm$  s.e.m. values for five and three mice on days 0 and 14, respectively, and the mean for two mice on day 30. Scale bars = 50  $\mu$ m.

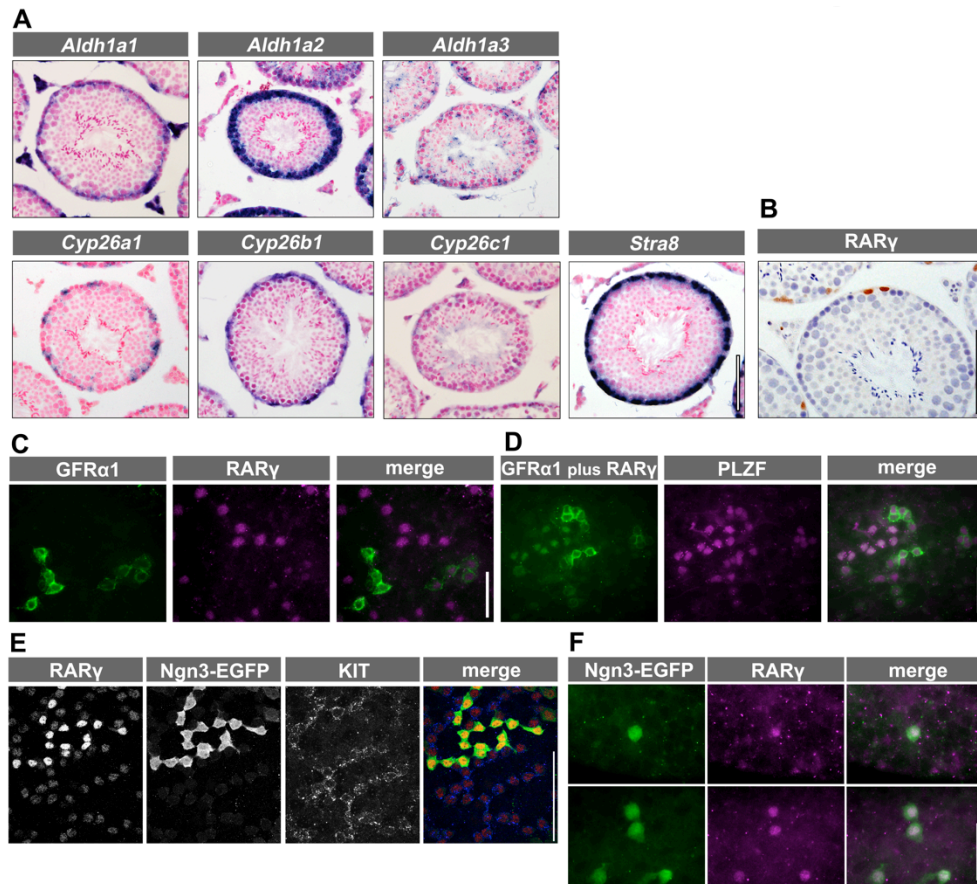

**Fig. S3. Expression of RA-related genes (related to Fig. 4).** (A) *In situ* hybridization of *Aldh1a1*, *Aldh1a2*, *Aldh1a3* (encoding enzymes synthesizing RA), *Cyp26a1*, *Cyp26b1*, *Cyp26c1* (encoding enzymes inactivating RA), and *Stra8* (an RA target gene) in normal testis. *Aldh1a1* is expressed at intermediate levels by Sertoli cells and peritubular cells as well as by interstitial cells. *Aldh1a2* is expressed at high levels by pachytene spermatocytes. *Cyp26a1* is expressed by Sertoli cells, and *Cyp26b1* is expressed by peritubular myoid cells. Expression of these genes does not show any particular spatial pattern related to vasculature or interstitial cells, and expression is observed mainly surrounding the tubule circumference. Further, the finding *Stra8* evenly surrounded the seminiferous tubule circumference does not support the conclusion that RA signaling is distributed unevenly. Signals emitted by *Aldh1a3* and *Cyp26c1* were too faint to identify the expression pattern. Nuclei were stained with Nuclear Fast Red. These data are largely consistent with those of previous studies (Sugimoto et al., 2012; Vernet et al., 2006). (B) Representative images of a cross-section of

the testis stained with an antibody against RAR $\gamma$  (diaminobenzidine (DAB), brown; hematoxylin, blue). Expression of RAR $\gamma$  was observed only in spermatogonia. (C) Detection of GFR $\alpha$ 1 (green) and RAR $\gamma$  (magenta) in whole mounts. Double-positive cells showed weaker signals for both proteins. (D) Whole-mount IF using a mixture of antibodies against RAR $\gamma$  and GFR $\alpha$ 1 (green) and an antibody against PLZF (magenta). Virtually all PLZF+ cells expressed RAR $\gamma$ , GFR $\alpha$ 1, or both. (E) Whole-mount IF of a seminiferous tubule of an *Ngn3-EGFP* mouse triple-stained with antibodies against RAR $\gamma$  (red), GFP (green), and KIT (blue). In addition to the strong RAR $\gamma$  signal detected in GFP+ cells, the image shows weaker staining of KIT+ cells. (F) Representative IF images of whole-mount seminiferous tubules from *Ngn3-EGFP* mice reacted with antibodies against GFP and RAR $\gamma$ . RAR $\gamma$ -expressing NGN3+ A<sub>s</sub> and A<sub>pr</sub> are shown. Scale bars = 100  $\mu$ m (A,B,E) and 50  $\mu$ m (C,D,F).

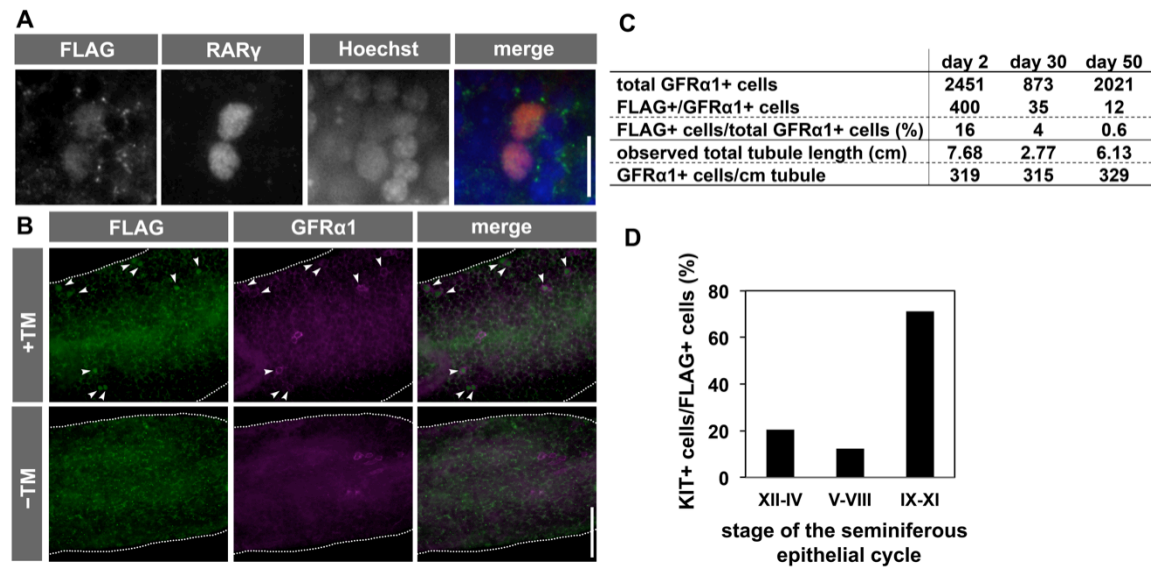

**Fig. S4. Expression of FLAG-RAR $\gamma$  in *Gfra1-CreER<sup>T2</sup>;CAG-CAT-3xFLAG-Rarg* mice and the fate of FLAG-RAR $\gamma$ + cells (related to Fig. 5).** Whole-mount IF of seminiferous tubules of *Gfra1-CreER<sup>T2</sup>;CAG-CAT-3xFLAG-Rarg* mice. (A) Representative IF images of FLAG (green), RAR $\gamma$  (red), and Hoechst (blue) of a seminiferous tubule of an animal injected with TM 2 days earlier. (B) IF images for FLAG (green) and GFR $\alpha$ 1 (magenta) of seminiferous tubules of mice injected with TM 2 days before (upper panels), or control animals not injected with TM (lower panels). Arrowheads indicate FLAG+ cells. (C) The contribution of FLAG-RAR $\gamma$ + cells to the total GFR $\alpha$ 1+ cell population, 2, 30 and 50 days after induction of FLAG-RAR $\gamma$  by TM injection. The total counts of cells from the indicated lengths of seminiferous tubules are summarized. Total counts of two testes on days 2 and one testis on days 30 and 50 are indicated. (D) The percentages of KIT+ cells among FLAG-RAR $\gamma$  + cells found in different seminiferous epithelial stages 4 days after TM injection. The figure shows 161, 57, and 76 FLAG+ cells that were analyzed for stages XII–IV, V–VIII, and IX–XI, respectively, in whole-mount seminiferous tubule specimens from a testis immunostained for FLAG and KIT. Staging of the seminiferous epithelium was performed according to published methods (Parvinen and Hecht, 1981). The stage was earlier by approximately three to four stages when FLAG-RAR $\gamma$  was induced, considering the lag between the TM injection and protein synthesis induction (1~2 days). Scale bars = 20  $\mu$ m (A) and 100  $\mu$ m (B).



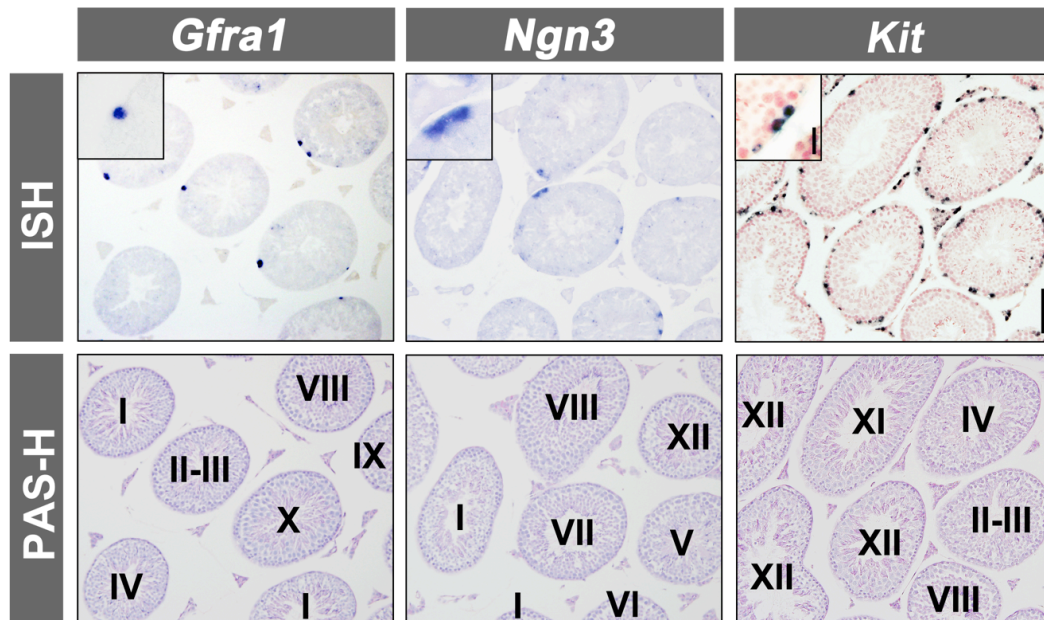

**Fig. S5. Expression of *Gfra1* and *Ngn3* in the testes (related to Fig. 6).** Images of *in situ* hybridization analysis of *Gfra1*, *Ngn3*, and *Kit* (top panels) and PAS-H staining (bottom panels) on adjacent sections of the undisturbed, wild-type mouse testis. Roman numerals indicate the stage of the seminiferous epithelial cycle. Nuclei were stained with Nuclear Fast Red only in the images of *in situ* hybridization analysis of *Kit*. Scale bar = 100  $\mu\text{m}$ . Insets show high-magnification images. Scale bar = 20  $\mu\text{m}$ .

## **Supplementary Materials and Methods**

### **Generation of *CAG-CAT-3xFLAG-Rarg* transgenic mice**

A *Bam*HI–*Xba*I fragment containing the *Rarg* coding sequence from a FANTOM cDNA clone G370007N15 (DNAFORM) and a fragment encoding a 3xFLAG-tag from pCMV-3Tag-6 (Agilent Technologies) were inserted into the plasmid pCAG-CAT (Kawamoto et al., 2000) to generate pCAG-CAT-3xFLAG-Rarg. A fragment containing the *CAG-CAT-3xFLAG-Rarg* region was microinjected into the pronuclei of single-cell embryos of C57BL/6J×C57BL/6J mice to produce transgenic mice (Laboratory Animal Resource Center, University of Tsukuba) in accordance with the University of Tsukuba's Guide for the Care and Use of Laboratory Animals with the approval of its Institutional Review Board.

### **Pulse labeling and induction of FLAG-RAR $\gamma$ by TM**

Induction of Cre-mediated recombination by TM to label GFR $\alpha$ 1+ and NGN3+ cells with GFP or to induce the FLAG-RAR $\gamma$  expression was performed as described previously (Hara et al., 2014; Nakagawa et al., 2010). Mice were injected i.p. with the indicated dose of TM (Sigma-Aldrich) per individual. TM was dissolved in DMSO, ethanol, and then sesame oil (Nacalai Tesque). The mouse strains, which were injected when they were 10–17 weeks of age, were as follows: 1. Subjected to VAD: *Ngn3-CreER<sup>TM</sup>*; *CAG-CAT-EGFP* (0.5 mg), *Gfral-CreER<sup>T2</sup>*; *CAG-CAT-EGFP* (1.0 mg), and *Gfral-CreER<sup>T2</sup>*; *CAG-CAT-3xFLAG-Rarg* (1.0 mg); and 2. Maintained under normal conditions: *Gfral-CreER<sup>T2</sup>*; *CAG-CAT-EGFP* (2.0 mg) and *Gfral-CreER<sup>T2</sup>*; *CAG-CAT-3xFLAG-Rarg* (2.0 mg).

### ***In situ* hybridization**

Under deep anesthesia induced using avertin, mice were perfused with 4% paraformaldehyde (PFA) in phosphate-buffered saline (PBS), and the testes were excised, embedded in paraffin, and sectioned. The sections were hybridized with digoxigenin-labeled riboprobes, and the hybrids were detected using BM purple AP substrate (Roche) according to a published method (Yoshida et al., 2001). *Ngn3*, *Kit*, *Aldh1a1*, *Aldh1a2*, *Aldh1a3*, *Cyp26b1*, *Cyp26c1* and *Stra8* probes were described previously (Sugimoto et al., 2012; Yoshida et al., 2004), and the IMAGE EST clone #6390018,



Accession #BC054378 (Invitrogen, Life Technologies) was used to prepare a *Gfral* probe. Stages of the seminiferous epithelium were judged from the adjacent section stained with periodic acid-Schiff (PAS) hematoxylin.

### **IF analysis**

Whole-mount IF of seminiferous tubules was performed according to a published method (Nakagawa et al., 2010). After the testes were dissected in PBS, untangled seminiferous tubules were fixed for 3 hours in 4% PFA in PBS and attached to an MAS-coated glass slide (Matsunami Glass). The samples were then dehydrated using a methanol series and rehydrated in TBST (TBS containing 0.1% Tween 20). After the samples were washed twice for 10 minutes each in TBST, they were saturated for 1 hour in TNB blocking buffer (PerkinElmer) containing 4% donkey serum (Jackson ImmunoResearch) and 0.01% Hoechst 33342 (Invitrogen, Life Technologies). Samples were next incubated at 4°C for 12 hours with primary antibody in TNB blocking buffer containing donkey serum at the dilutions indicated below and washed three times in TBST for 15 minutes each. Tissues were then incubated with secondary antibody for 1 hour at room temperature. The observations and measurements were performed using a BX51 upright fluorescence microscope equipped with a DP72 CCD camera (Olympus) or using a Leica TCS SP8 Confocal System. Primary antibodies used in this study and their dilution factors (in parentheses) were as follows: anti-GFR $\alpha$ 1 goat polyclonal antibody (R&D Systems, #AF560, 1:200); anti-GFP rabbit, rat, or chicken polyclonal antibodies (Invitrogen, Life Technologies, #A11122, 1:300; Nacalai Tesque, #04404-84, 1:200; or Abcam, #13970, 1:200, respectively); anti-KIT rat monoclonal antibody (BD Biosciences, #553352, 1:200); anti-RAR $\gamma$ 1 rabbit monoclonal antibody (Cell Signaling Technologies, #8965, 1:200); anti-DDDDK rabbit polyclonal antibody (MBL, #PM020, 1:500); anti-FLAG mouse monoclonal antibody (Sigma, #F1804, 1:500); and anti-PLZF mouse monoclonal antibody (Calbiochem, #OP128, 1:50). The secondary antibodies manufactured at Invitrogen, Life Technologies were as follows (all diluted 1:400): Alexa 488-conjugated anti-goat (#A11055), anti-rabbit (#A21206), anti-rat (#A21208) IgGs; Alexa 594-conjugated anti-goat (#A11058), anti-rabbit (#A21207), anti-rat (#A21209) IgGs; and Alexa 647-conjugated anti-goat (#A21447) IgG.

### **Immunohistochemistry**

For immunostaining paraffin sections, testes were fixed in 4% PFA–PBS for 12 hours at 4°C, dehydrated, and then embedded in paraffin. Deparaffinized sections were blocked with blocking reagent (PerkinElmer) and incubated with an anti-RAR $\gamma$ 1 rabbit monoclonal antibody (1:800). The immunoreaction was visualized using a biotin-conjugated anti-rabbit secondary antibody (Vector labs) in combination with an ABC Kit (Vector labs) and a DAB substrate Kit (Vector labs). Finally, the sections were stained with hematoxylin (Wako) to visualize nuclei.

### **Microarray analysis of gene expression**

Total RNA was extracted using the RNeasy Micro Kit (Qiagen). RNA was converted to cDNA, and cRNA was then amplified using the Low Input Quick Amp Labeling Kit (Agilent Technologies). Cyanine 3-CTP-labeled cRNAs were combined and hybridized to the SurePrint G3 Mouse GE 8x60K Microarray (Agilent Technologies) using a Gene Expression Hybridization Kit (Agilent Technologies). After hybridization, arrays were washed and dried according to the manufacturer's instructions. Arrays were scanned using an Agilent Technologies Scanner (G2505C and G2565CA) with the default settings for 8 × 60k-format one-color arrays. Images were analyzed using Feature Extraction ver.10.7.3.1 (Agilent Technologies). Three samples from different animals were used to analyze each spermatogonial fraction (for NGN3+ cells, samples from two mice were pooled). Data preparation and statistical analysis were performed using Gene Spring v12.0.0.0 (Silicon Genetics). Data correction was performed with the threshold raw signals set to 1.0, percent shift to the 75th percentile as normalization algorithm, and no baseline transformation. Genes selected for display in Fig. 4A and Table S2 are associated with the following gene ontology (GO) terms: retinoic acid receptor activity, retinoic acid receptor binding, retinoic acid receptor signaling pathway, regulation of retinoic acid receptor signaling pathway, retinoic acid 4-hydroxylase histone acetyltransferase complex, mediator complex, histone deacetylase complex, ligand-dependent chromatin remodeling, and ATP-dependent chromatin remodeling.

### **Quantitative RT-PCR**

Total RNA was isolated using an mirVana miRNA Isolation Kit (Ambion, Life Technologies) and reverse-transcribed using SuperScript III First-Strand Synthesis SuperMix for qRT-PCR primed

with a mixture of oligo(dT) and random hexamers (Invitrogen, Life Technologies). After treatment with DNase I (Ambion, Life Technologies), quantitative PCR was performed using TaqMan Universal PCR Master Mix and probes for *Rarg* (Mm00441091\_m1), *Rara* (Mm01296312\_m1), and *Actb* (Mm00607939\_s1) (Applied Biosystems, Life Technologies) using a LightCycler 480 system (Roche).

**Supplementary Reference**

**Parvinen, M. and Hecht, N. B.** (1981). Identification of living spermatogenic cells of the mouse by transillumination-phase contrast microscopic technique for 'in situ' analyses of DNA polymerase activities. *Histochemistry* **71**, 567-579.

Table S1. Numbers of spermatogonia versus Sertoli cells in VAD mouse testes (related to Fig. 1F)

| Days after VA readadministration | <i>Gfra1+</i> |               | <i>Ngn3+</i>  |               | <i>Kit+</i>   |               |
|----------------------------------|---------------|---------------|---------------|---------------|---------------|---------------|
|                                  | spermatogonia | Sertoli cells | spermatogonia | Sertoli cells | spermatogonia | Sertoli cells |
| <b>day 0</b>                     | 378           | 12349         | 2401          | 15757         | 0             | 7566          |
| <b>day 2</b>                     | 181           | 6641          | 308           | 7455          | 1651          | 7286          |
| <b>day 4</b>                     | 367           | 8247          | 114           | 9593          | 3226          | 8947          |

Total counts of spermatogonia and Sertoli cells in sections prepared from two or three testes of VAD mice probed with *Gfra1*, *Ngn3*, and *Kit*. Counts are summarized in Fig. 1G.

Table S2. Microarray analysis of retinoic acid-related gene expression by GFR $\alpha$ 1+ and NGN3+ cells

Ratio are represented as  $\log_2([Ngn3+]/[GFR\alpha1+])$ , where [Ngn3+] and [GFR $\alpha$ 1+] indicate the average signal intensities obtained from Ngn3+ and GFR $\alpha$ 1+ spermatogonia, respectively (n = 3).

P values are calculated using t test with Benjamini-Hochberg correction for false discovery rate.

| ProbeName     | GeneSymbol | EntrezGeneID | ratio | p (Corr) |
|---------------|------------|--------------|-------|----------|
| A_51_P474658  | Esr1       | 13982        | 2.28  | 0.006    |
| A_55_P2051716 | Tbx1       | 21380        | 1.87  | 0.015    |
| A_52_P237077  | Esr1       | 13982        | 1.64  | 0.006    |
| A_55_P2151056 | Rarg       | 19411        | 1.64  | 0.007    |
| A_51_P501844  | Cyp26b1    | 232174       | 1.62  | 0.006    |
| A_51_P226711  | Ptf1a      | 19213        | 1.61  | 0.102    |
| A_55_P2164040 | Tada2b     | 231151       | 1.34  | 0.022    |
| A_55_P2065074 | Hdac9      | 79221        | 1.32  | 0.103    |
| A_55_P2019009 | Ncoa7      | 211329       | 1.24  | 0.081    |
| A_55_P2036620 | Lrif1      | 321000       | 1.17  | 0.074    |
| A_66_P114585  | Mta3       | 116871       | 1.11  | 0.016    |
| A_55_P2030883 | Esr1       | 13982        | 0.94  | 0.041    |
| A_55_P2027822 | Ccdc101    | 75565        | 0.91  | 0.006    |
| A_51_P140797  | Dcaf6      | 74106        | 0.89  | 0.014    |
| A_55_P1977850 | Sall1      | 58198        | 0.87  | 0.023    |
| A_51_P152747  | Nrip1      | 268903       | 0.82  | 0.018    |
| A_52_P536927  | Satb2      | 212712       | 0.81  | 0.162    |
| A_51_P399845  | Fgf2       | 14173        | 0.78  | 0.061    |
| A_55_P2018559 | Morf4l1    | 21761        | 0.78  | 0.037    |
| A_55_P1981794 | Ccdc101    | 75565        | 0.74  | 0.007    |
| A_55_P2369474 | Nr1h4      | 20186        | 0.71  | 0.263    |
| A_55_P2128597 | Nr1h3      | 22259        | 0.68  | 0.036    |
| A_55_P1993168 | Ppargc1b   | 170826       | 0.65  | 0.275    |
| A_66_P120249  | Nr1h3      | 22259        | 0.64  | 0.021    |
| A_66_P126138  | Ncoa1      | 17977        | 0.60  | 0.043    |



|               |         |        |      |       |
|---------------|---------|--------|------|-------|
| A_55_P2061386 | Chd3    | 216848 | 0.56 | 0.030 |
| A_52_P413584  | Nrip1   | 268903 | 0.55 | 0.427 |
| A_52_P656545  | Ogt     | 108155 | 0.52 | 0.068 |
| A_55_P2163438 | Actn2   | 11472  | 0.50 | 0.071 |
| A_55_P2134616 | Med12l  | 329650 | 0.50 | 0.215 |
| A_55_P2025463 | Brpf3   | 268936 | 0.48 | 0.073 |
| A_55_P2130975 | Ncoa1   | 17977  | 0.44 | 0.102 |
| A_55_P2031367 | Brd1    | 223770 | 0.39 | 0.077 |
| A_52_P334562  | Vdr     | 22337  | 0.39 | 0.280 |
| A_51_P106799  | Pparg   | 19016  | 0.37 | 0.043 |
| A_51_P108266  | Actn2   | 11472  | 0.36 | 0.413 |
| A_55_P1983006 | Hdac5   | 15184  | 0.35 | 0.171 |
| A_51_P441387  | Kansl1l | 68691  | 0.33 | 0.237 |
| A_51_P307370  | Rxra    | 20181  | 0.32 | 0.119 |
| A_55_P1958532 | Hr      | 15460  | 0.32 | 0.301 |
| A_52_P494686  | Kansl1l | 68691  | 0.32 | 0.068 |
| A_55_P2244722 | Taf9b   | 407786 | 0.31 | 0.006 |
| A_52_P58145   | Aldh1a2 | 19378  | 0.28 | 0.036 |
| A_55_P2095342 | Rara    | 19401  | 0.23 | 0.084 |
| A_55_P2153461 | Cecr2   | 330409 | 0.21 | 0.149 |
| A_55_P2082070 | Taf9    | 108143 | 0.21 | 0.179 |
| A_55_P1986993 | Brd8    | 78656  | 0.20 | 0.541 |
| A_55_P2135383 | Taf6l   | 225895 | 0.19 | 0.318 |
| A_55_P1978481 | Nr1h2   | 22260  | 0.18 | 0.325 |
| A_55_P2415372 | Mta1    | 116870 | 0.17 | 0.180 |
| A_55_P2080542 | Rbbp7   | 245688 | 0.16 | 0.361 |
| A_55_P2036615 | Lrif1   | 321000 | 0.13 | 0.220 |
| A_66_P130582  | Ncoa1   | 17977  | 0.12 | 0.583 |
| A_55_P1967618 | Med16   | 216154 | 0.12 | 0.262 |

|               |          |        |       |       |
|---------------|----------|--------|-------|-------|
| A_51_P279038  | Ppargc1a | 19017  | 0.12  | 0.717 |
| A_51_P481191  | Hdac8    | 70315  | 0.11  | 0.683 |
| A_51_P508853  | Ep400    | 75560  | 0.11  | 0.901 |
| A_51_P213334  | Hdac11   | 232232 | 0.11  | 0.522 |
| A_66_P129029  | Taf10    | 24075  | 0.09  | 0.452 |
| A_66_P120260  | Taf10    | 24075  | 0.09  | 0.464 |
| A_51_P432199  | Sap30    | 60406  | 0.09  | 0.560 |
| A_55_P2024654 | Trrap    | 100683 | 0.08  | 0.616 |
| A_65_P17492   | Med29    | 67224  | 0.08  | 0.509 |
| A_52_P175952  | Map3k7   | 26409  | 0.06  | 0.698 |
| A_51_P417839  | Hdac4    | 208727 | 0.05  | 0.732 |
| A_55_P2185548 | Cdk8     | 264064 | 0.04  | 0.785 |
| A_55_P2022094 | Mta3     | 116871 | 0.03  | 0.832 |
| A_55_P2162537 | Ing4     | 28019  | 0.03  | 0.884 |
| A_55_P1960873 | Mbd3     | 17192  | 0.03  | 0.722 |
| A_66_P127024  | Mbd3     | 17192  | 0.02  | 0.876 |
| A_55_P2008609 | Rxrb     | 20182  | 0.02  | 0.832 |
| A_55_P1993820 | Kdm1a    | 99982  | 0.02  | 0.860 |
| A_51_P141521  | Sap130   | 269003 | 0.01  | 0.944 |
| A_52_P589550  | Nr2c1    | 22025  | 0.01  | 0.983 |
| A_52_P319541  | Med12l   | 329650 | 0.00  | 0.999 |
| A_55_P2077608 | Hdac1    | 433759 | 0.00  | 0.999 |
| A_51_P350503  | Csrp2bp  | 228714 | -0.01 | 0.992 |
| A_66_P138072  | Esr1     | 13982  | -0.01 | 0.984 |
| A_52_P464062  | Hdac8    | 70315  | -0.01 | 0.978 |
| A_55_P2170076 | Taf9     | 108143 | -0.02 | 0.893 |
| A_51_P392861  | Med25    | 75613  | -0.02 | 0.938 |
| A_55_P2036894 | Med29    | 67224  | -0.03 | 0.652 |
| A_55_P2084807 | Rarb     | 218772 | -0.04 | 0.969 |

|               |         |        |       |       |
|---------------|---------|--------|-------|-------|
| A_55_P1960626 | Satb2   | 212712 | -0.05 | 0.969 |
| A_55_P2049086 | Map3k7  | 26409  | -0.05 | 0.717 |
| A_52_P325477  | Trim16  | 94092  | -0.05 | 0.826 |
| A_65_P01783   | Med28   | 66999  | -0.07 | 0.589 |
| A_55_P1992655 | Hdac6   | 15185  | -0.07 | 0.458 |
| A_66_P128384  | Hdac1   | 433759 | -0.08 | 0.678 |
| A_55_P1957028 | Kat7    | 217127 | -0.08 | 0.614 |
| A_51_P103757  | Kat8    | 67773  | -0.08 | 0.372 |
| A_66_P124715  | Ppard   | 19015  | -0.08 | 0.717 |
| A_52_P238044  | Psmc3ip | 19183  | -0.08 | 0.718 |
| A_55_P2171993 | Mrgbp   | 73247  | -0.08 | 0.467 |
| A_55_P2072551 | Ncoa6   | 56406  | -0.09 | 0.917 |
| A_55_P2025974 | Ruvbl2  | 20174  | -0.09 | 0.368 |
| A_52_P579876  | Suds3   | 71954  | -0.10 | 0.646 |
| A_55_P2154690 | Smarca4 | 20586  | -0.11 | 0.653 |
| A_55_P1971347 | Mta3    | 116871 | -0.11 | 0.476 |
| A_55_P2081560 | Phf20   | 228829 | -0.11 | 0.547 |
| A_55_P2087825 | Ncoa2   | 17978  | -0.11 | 0.336 |
| A_52_P561927  | Ncor1   | 20185  | -0.12 | 0.467 |
| A_52_P376106  | Slc30a9 | 109108 | -0.13 | 0.450 |
| A_52_P402319  | Med20   | 56771  | -0.13 | 0.298 |
| A_51_P492087  | Pole3   | 59001  | -0.13 | 0.280 |
| A_55_P1962154 | Rarb    | 218772 | -0.14 | 0.803 |
| A_55_P2080794 | Taf9    | 108143 | -0.14 | 0.343 |
| A_51_P465772  | Ruvbl1  | 56505  | -0.15 | 0.329 |
| A_66_P102232  | Hmga1   | 15361  | -0.15 | 0.795 |
| A_55_P2095345 | Rara    | 19401  | -0.15 | 0.473 |
| A_52_P370473  | Msl1    | 74026  | -0.16 | 0.211 |
| A_66_P100789  | Kansl2  | 69612  | -0.16 | 0.228 |

|               |         |        |       |       |
|---------------|---------|--------|-------|-------|
| A_55_P1956712 | Med28   | 66999  | -0.16 | 0.043 |
| A_51_P416419  | Calr    | 12317  | -0.17 | 0.061 |
| A_51_P199567  | Med26   | 70625  | -0.18 | 0.064 |
| A_55_P2036459 | Med24   | 23989  | -0.18 | 0.286 |
| A_52_P413623  | Usp22   | 216825 | -0.18 | 0.107 |
| A_55_P2003789 | Taf4a   | 228980 | -0.18 | 0.150 |
| A_55_P2025293 | Ss18    | 268996 | -0.18 | 0.177 |
| A_55_P1987302 | Eny2    | 223527 | -0.18 | 0.083 |
| A_51_P349662  | Taf51   | 102162 | -0.19 | 0.246 |
| A_51_P483118  | Hmga1   | 15361  | -0.20 | 0.208 |
| A_55_P1987449 | Ep400   | 75560  | -0.20 | 0.102 |
| A_55_P1955722 | Med15   | 94112  | -0.20 | 0.096 |
| A_55_P2128263 | Phf21a  | 192285 | -0.20 | 0.383 |
| A_55_P2154684 | Smarca4 | 20586  | -0.21 | 0.142 |
| A_55_P2147591 | Med27   | 68975  | -0.21 | 0.030 |
| A_51_P161874  | Med30   | 69790  | -0.21 | 0.083 |
| A_55_P1964033 | Carm1   | 59035  | -0.21 | 0.184 |
| A_66_P107585  | Taf2    | 319944 | -0.22 | 0.247 |
| A_55_P2009792 | Hdac6   | 15185  | -0.23 | 0.030 |
| A_55_P1970775 | Hdac1   | 433759 | -0.23 | 0.083 |
| A_55_P1962419 | Ccar1   | 67500  | -0.23 | 0.084 |
| A_55_P2036526 | Mbd2    | 17191  | -0.23 | 0.346 |
| A_55_P2016877 | Nsd1    | 18193  | -0.23 | 0.159 |
| A_51_P159415  | Sin3a   | 20466  | -0.24 | 0.078 |
| A_66_P111773  | Gatad2a | 234366 | -0.26 | 0.133 |
| A_55_P2099585 | Rarb    | 218772 | -0.26 | 0.722 |
| A_51_P164207  | Mta2    | 23942  | -0.26 | 0.123 |
| A_51_P116027  | Med27   | 68975  | -0.27 | 0.023 |
| A_55_P2092501 | Med1    | 19014  | -0.27 | 0.116 |

|               |        |        |       |       |
|---------------|--------|--------|-------|-------|
| A_55_P2003517 | Zfp536 | 243937 | -0.27 | 0.259 |
| A_55_P2123137 | Ncor2  | 20602  | -0.27 | 0.146 |
| A_51_P226053  | Sra1   | 24068  | -0.27 | 0.036 |
| A_55_P2049602 | Kat2a  | 14534  | -0.28 | 0.043 |
| A_55_P2107120 | Kansl2 | 69612  | -0.28 | 0.071 |
| A_55_P2165969 | Ncor1  | 20185  | -0.28 | 0.331 |
| A_51_P496400  | Med9   | 192191 | -0.29 | 0.060 |
| A_55_P2051727 | Rnf8   | 58230  | -0.29 | 0.020 |
| A_55_P1972653 | Tada3  | 101206 | -0.29 | 0.010 |
| A_55_P1996742 | Rbm14  | 56275  | -0.29 | 0.318 |
| A_55_P1987504 | Ccnc   | 51813  | -0.29 | 0.159 |
| A_55_P2123822 | Rbbp7  | 245688 | -0.29 | 0.053 |
| A_55_P2018407 | Sycp3  | 20962  | -0.30 | 0.014 |
| A_51_P116007  | Hdac2  | 15182  | -0.30 | 0.030 |
| A_55_P2054540 | Crebbp | 12914  | -0.30 | 0.292 |
| A_55_P2076057 | Hmga1  | 15361  | -0.31 | 0.060 |
| A_55_P2108334 | Med10  | 28077  | -0.31 | 0.180 |
| A_51_P218953  | Zfp536 | 243937 | -0.31 | 0.383 |
| A_51_P141554  | Med22  | 20933  | -0.31 | 0.065 |
| A_55_P1975640 | Zfp217 | 228913 | -0.31 | 0.118 |
| A_55_P2057291 | Kansl3 | 226976 | -0.32 | 0.018 |
| A_52_P219943  | Epc1   | 13831  | -0.32 | 0.171 |
| A_55_P1972852 | Mers1  | 51812  | -0.32 | 0.048 |
| A_51_P396708  | Med21  | 108098 | -0.32 | 0.020 |
| A_55_P2125241 | Brd1   | 223770 | -0.33 | 0.180 |
| A_51_P286814  | Ncor2  | 20602  | -0.33 | 0.116 |
| A_55_P2165974 | Ncor1  | 20185  | -0.33 | 0.179 |
| A_65_P19089   | Esrrg  | 26381  | -0.33 | 0.476 |
| A_51_P202014  | Taf12  | 66464  | -0.33 | 0.137 |

|               |         |        |       |       |
|---------------|---------|--------|-------|-------|
| A_55_P2072233 | Zcchc12 | 72693  | -0.33 | 0.176 |
| A_51_P349803  | Med11   | 66172  | -0.34 | 0.150 |
| A_51_P373369  | Med4    | 67381  | -0.34 | 0.087 |
| A_51_P307325  | Rbbp4   | 19646  | -0.34 | 0.136 |
| A_51_P261107  | Ogt     | 108155 | -0.34 | 0.103 |
| A_51_P432069  | Trrap   | 100683 | -0.34 | 0.516 |
| A_52_P504068  | Cdk8    | 264064 | -0.34 | 0.007 |
| A_52_P78875   | Phf12   | 268448 | -0.35 | 0.142 |
| A_51_P380986  | Epc1    | 13831  | -0.35 | 0.054 |
| A_51_P172842  | Med19   | 381379 | -0.35 | 0.048 |
| A_52_P231737  | Actl6a  | 56456  | -0.35 | 0.029 |
| A_55_P2083654 | Prmt2   | 15468  | -0.35 | 0.171 |
| A_55_P2048202 | Ss18    | 268996 | -0.36 | 0.058 |
| A_55_P1993109 | Taf6    | 21343  | -0.36 | 0.030 |
| A_52_P497056  | Supt20  | 56790  | -0.36 | 0.147 |
| A_55_P2111419 | Eny2    | 223527 | -0.36 | 0.048 |
| A_51_P370286  | Med24   | 23989  | -0.37 | 0.030 |
| A_52_P197666  | Med12   | 59024  | -0.37 | 0.012 |
| A_55_P2044359 | Rxrg    | 20183  | -0.38 | 0.331 |
| A_55_P2071868 | Ncoa3   | 17979  | -0.38 | 0.068 |
| A_55_P2034400 | Cdk8    | 264064 | -0.38 | 0.014 |
| A_52_P529486  | Wdr77   | 70465  | -0.38 | 0.016 |
| A_66_P132855  | Baz1b   | 22385  | -0.38 | 0.079 |
| A_51_P212630  | Chd8    | 67772  | -0.38 | 0.063 |
| A_55_P1965629 | Hcfc1   | 15161  | -0.39 | 0.008 |
| A_55_P1959953 | Helz2   | 229003 | -0.39 | 0.272 |
| A_55_P2128270 | Phf21a  | 192285 | -0.39 | 0.122 |
| A_51_P116616  | Rbm14   | 56275  | -0.39 | 0.030 |
| A_51_P510663  | Supt3   | 109115 | -0.40 | 0.060 |



|               |         |        |       |       |
|---------------|---------|--------|-------|-------|
| A_55_P2077879 | Kat6b   | 54169  | -0.40 | 0.052 |
| A_55_P1955676 | Csrp2bp | 228714 | -0.40 | 0.024 |
| A_55_P2132502 | Pkn1    | 320795 | -0.40 | 0.012 |
| A_55_P1974412 | Kat2a   | 14534  | -0.40 | 0.041 |
| A_52_P391018  | Phf16   | 382207 | -0.41 | 0.201 |
| A_66_P119017  | Smarca1 | 93761  | -0.41 | 0.378 |
| A_66_P133043  | Mbd2    | 17191  | -0.41 | 0.079 |
| A_55_P2019004 | Ncoa7   | 211329 | -0.41 | 0.603 |
| A_52_P110291  | Phf12   | 268448 | -0.42 | 0.015 |
| A_52_P117197  | Epc1    | 13831  | -0.42 | 0.007 |
| A_55_P1996329 | Kat5    | 81601  | -0.43 | 0.009 |
| A_55_P2033521 | Med6    | 69792  | -0.43 | 0.046 |
| A_55_P2002314 | Zmiz2   | 52915  | -0.43 | 0.037 |
| A_55_P2074331 | Rxra    | 20181  | -0.43 | 0.126 |
| A_55_P1991802 | Csrp2bp | 228714 | -0.43 | 0.025 |
| A_55_P2139753 | Phf15   | 76901  | -0.43 | 0.043 |
| A_52_P101333  | Sap18   | 20220  | -0.44 | 0.121 |
| A_55_P2153459 | Cecr2   | 330409 | -0.44 | 0.030 |
| A_51_P423880  | Smarcd3 | 66993  | -0.44 | 0.096 |
| A_55_P2017714 | Kat5    | 81601  | -0.44 | 0.033 |
| A_55_P1979356 | Morf4l1 | 21761  | -0.44 | 0.018 |
| A_55_P2138120 | Atxn7l3 | 217218 | -0.44 | 0.042 |
| A_51_P263220  | Taf5    | 226182 | -0.45 | 0.024 |
| A_55_P2016712 | Msl1    | 74026  | -0.45 | 0.030 |
| A_51_P513311  | Rxrg    | 20183  | -0.45 | 0.324 |
| A_52_P538709  | Tada3   | 101206 | -0.46 | 0.008 |
| A_55_P1973402 | Tada2a  | 217031 | -0.46 | 0.006 |
| A_55_P2077884 | Kat6b   | 54169  | -0.46 | 0.152 |
| A_55_P1964009 | Zfp217  | 228913 | -0.46 | 0.063 |

|               |         |        |       |       |
|---------------|---------|--------|-------|-------|
| A_55_P2098688 | Mcrs1   | 51812  | -0.46 | 0.041 |
| A_51_P100787  | Snw1    | 66354  | -0.47 | 0.044 |
| A_51_P141104  | Med18   | 67219  | -0.47 | 0.020 |
| A_52_P266459  | Ing2    | 69260  | -0.47 | 0.101 |
| A_51_P111455  | Wdr77   | 70465  | -0.47 | 0.014 |
| A_55_P2054240 | Med8    | 80509  | -0.48 | 0.009 |
| A_51_P397768  | Csnk2a1 | 12995  | -0.48 | 0.017 |
| A_52_P176300  | Med1    | 19014  | -0.48 | 0.007 |
| A_51_P233788  | Dmap1   | 66233  | -0.48 | 0.025 |
| A_55_P2108324 | Med12   | 59024  | -0.49 | 0.090 |
| A_51_P465809  | Slc30a9 | 109108 | -0.49 | 0.037 |
| A_55_P1967617 | Med16   | 216154 | -0.49 | 0.176 |
| A_55_P1968464 | Kat6a   | 244349 | -0.49 | 0.044 |
| A_55_P2078776 | Mll5    | 69188  | -0.49 | 0.016 |
| A_55_P1992640 | Hdac3   | 15183  | -0.50 | 0.015 |
| A_51_P129149  | Gatad2a | 234366 | -0.51 | 0.038 |
| A_55_P2004385 | Csrp2bp | 228714 | -0.51 | 0.015 |
| A_51_P463828  | Baz1b   | 22385  | -0.51 | 0.110 |
| A_55_P1958306 | Thrap3  | 230753 | -0.51 | 0.023 |
| A_52_P653902  | Eny2    | 223527 | -0.52 | 0.090 |
| A_55_P2146404 | Kansl1  | 76719  | -0.52 | 0.030 |
| A_52_P3412    | Med17   | 234959 | -0.52 | 0.031 |
| A_55_P2095365 | Meaf6   | 70088  | -0.53 | 0.023 |
| A_55_P2111875 | Taf12   | 66464  | -0.53 | 0.371 |
| A_55_P1994917 | Wdr5    | 140858 | -0.53 | 0.016 |
| A_55_P2134356 | Msl3    | 17692  | -0.53 | 0.030 |
| A_55_P1963606 | Hcfc1   | 15161  | -0.55 | 0.095 |
| A_52_P282987  | Yeats2  | 208146 | -0.55 | 0.021 |
| A_55_P1971828 | Csnk2a1 | 12995  | -0.56 | 0.007 |

|               |         |        |       |       |
|---------------|---------|--------|-------|-------|
| A_51_P203474  | Tsg101  | 22088  | -0.56 | 0.030 |
| A_52_P647291  | Cecr2   | 330409 | -0.57 | 0.058 |
| A_55_P2116853 | Brpf1   | 78783  | -0.57 | 0.007 |
| A_55_P2083814 | Zzz3    | 108946 | -0.57 | 0.006 |
| A_51_P274465  | Sycp3   | 20962  | -0.57 | 0.050 |
| A_51_P265338  | Nr0b2   | 23957  | -0.58 | 0.480 |
| A_55_P2056100 | Pus1    | 56361  | -0.58 | 0.009 |
| A_55_P2121466 | Ncor1   | 20185  | -0.58 | 0.104 |
| A_55_P2016708 | Msl1    | 74026  | -0.59 | 0.007 |
| A_51_P255387  | Med31   | 67279  | -0.59 | 0.006 |
| A_55_P2026889 | Med10   | 28077  | -0.59 | 0.007 |
| A_55_P2070179 | Ing4    | 28019  | -0.59 | 0.029 |
| A_66_P112546  | Yeats4  | 64050  | -0.60 | 0.015 |
| A_55_P2092526 | Tgif1   | 21815  | -0.60 | 0.057 |
| A_55_P2085664 | Meaf6   | 70088  | -0.60 | 0.006 |
| A_55_P2112667 | Fshr    | 14309  | -0.60 | 0.179 |
| A_66_P135192  | Msl2    | 77853  | -0.60 | 0.038 |
| A_55_P2033520 | Med6    | 69792  | -0.60 | 0.006 |
| A_51_P173384  | Tada1   | 27878  | -0.60 | 0.012 |
| A_55_P2022845 | Csnk2a1 | 12995  | -0.60 | 0.006 |
| A_55_P1975341 | Nasp    | 50927  | -0.60 | 0.045 |
| A_52_P502267  | Epc2    | 227867 | -0.61 | 0.016 |
| A_55_P1989858 | Thrap3  | 230753 | -0.61 | 0.009 |
| A_55_P2236607 | Ccnc    | 51813  | -0.61 | 0.020 |
| A_66_P129111  | Nasp    | 50927  | -0.62 | 0.107 |
| A_55_P1968698 | Rere    | 68703  | -0.63 | 0.066 |
| A_51_P481644  | Mbip    | 217588 | -0.63 | 0.032 |
| A_52_P424767  | Rbbp4   | 19646  | -0.64 | 0.023 |
| A_51_P324082  | Med1    | 19014  | -0.65 | 0.007 |

|               |          |        |       |       |
|---------------|----------|--------|-------|-------|
| A_55_P2095727 | Pml      | 18854  | -0.65 | 0.015 |
| A_52_P411601  | Ep300    | 328572 | -0.65 | 0.006 |
| A_55_P2041397 | Ezh2     | 14056  | -0.66 | 0.028 |
| A_52_P327467  | Med7     | 66213  | -0.67 | 0.009 |
| A_55_P2112737 | Actb     | 11461  | -0.67 | 0.006 |
| A_55_P2179834 | Gatad2a  | 234366 | -0.68 | 0.018 |
| A_55_P1960281 | Med7     | 66213  | -0.70 | 0.007 |
| A_55_P2024095 | Med1     | 19014  | -0.70 | 0.021 |
| A_55_P2237432 | Smarca1  | 93761  | -0.71 | 0.103 |
| A_52_P462350  | Dr1      | 13486  | -0.72 | 0.007 |
| A_51_P255565  | Smarcad1 | 13990  | -0.73 | 0.018 |
| A_55_P1965836 | Crebbp   | 12914  | -0.73 | 0.007 |
| A_55_P1977593 | Epc2     | 227867 | -0.74 | 0.041 |
| A_55_P2127804 | Map3k7   | 26409  | -0.75 | 0.064 |
| A_52_P565940  | Nsd1     | 18193  | -0.75 | 0.005 |
| A_52_P264229  | Ing5     | 66262  | -0.75 | 0.007 |
| A_55_P2090179 | Cbx5     | 12419  | -0.76 | 0.025 |
| A_52_P80593   | Pole3    | 59001  | -0.77 | 0.006 |
| A_55_P1970755 | Hdac9    | 79221  | -0.79 | 0.101 |
| A_55_P2033413 | Med4     | 67381  | -0.79 | 0.006 |
| A_55_P2180551 | Fam60a   | 56306  | -0.80 | 0.008 |
| A_52_P515826  | Med13    | 327987 | -0.80 | 0.130 |
| A_55_P2033932 | Zzz3     | 108946 | -0.81 | 0.071 |
| A_55_P2035407 | Cyp26c1  | 546726 | -0.81 | 0.014 |
| A_55_P2090535 | Thrap3   | 230753 | -0.81 | 0.013 |
| A_55_P1968200 | Hjurp    | 381280 | -0.81 | 0.048 |
| A_55_P2018457 | Hdac7    | 56233  | -0.81 | 0.021 |
| A_51_P224517  | Phf17    | 269424 | -0.82 | 0.006 |
| A_55_P1971804 | Hdac10   | 170787 | -0.84 | 0.007 |

|               |          |        |       |       |
|---------------|----------|--------|-------|-------|
| A_55_P2078770 | Mll5     | 69188  | -0.84 | 0.009 |
| A_66_P127255  | Ing3     | 71777  | -0.88 | 0.007 |
| A_55_P1986902 | Med23    | 70208  | -0.88 | 0.014 |
| A_51_P136792  | Calcoco1 | 67488  | -0.90 | 0.014 |
| A_51_P502764  | Hdac10   | 170787 | -0.90 | 0.006 |
| A_51_P457358  | Med13l   | 76199  | -0.90 | 0.041 |
| A_55_P2006499 | Esrrg    | 26381  | -0.91 | 0.065 |
| A_65_P01247   | Hjurp    | 381280 | -0.91 | 0.014 |
| A_55_P2011702 | Ppargc1a | 19017  | -0.91 | 0.007 |
| A_52_P382149  | Cyp26a1  | 13082  | -0.92 | 0.030 |
| A_55_P2161267 | Uimc1    | 20184  | -0.95 | 0.177 |
| A_55_P2048705 | Fgf2     | 14173  | -0.95 | 0.012 |
| A_55_P2022840 | Csnk2a1  | 12995  | -0.96 | 0.014 |
| A_55_P1998947 | Trim16   | 94092  | -0.97 | 0.069 |
| A_55_P2072556 | Ncoa6    | 56406  | -0.99 | 0.020 |
| A_65_P20174   | Phf17    | 269424 | -1.00 | 0.006 |
| A_65_P07450   | Brd8     | 78656  | -1.01 | 0.041 |
| A_65_P20249   | Prkecb   | 18751  | -1.01 | 0.024 |
| A_55_P2045096 | Hjurp    | 381280 | -1.01 | 0.010 |
| A_51_P257762  | Kat2b    | 18519  | -1.03 | 0.014 |
| A_55_P2020373 | Chd4     | 107932 | -1.04 | 0.006 |
| A_51_P450924  | Pole4    | 66979  | -1.06 | 0.048 |
| A_66_P107680  | Med8     | 80509  | -1.06 | 0.006 |
| A_55_P1989865 | Thrap3   | 230753 | -1.07 | 0.008 |
| A_55_P2360661 | Cbx5     | 12419  | -1.11 | 0.003 |
| A_55_P2183750 | Ncoa3    | 17979  | -1.12 | 0.006 |
| A_55_P2075636 | Epc2     | 227867 | -1.18 | 0.020 |
| A_52_P83959   | Taf7     | 24074  | -1.25 | 0.004 |
| A_55_P2059134 | Smarca5  | 93762  | -1.25 | 0.006 |

|               |         |        |       |       |
|---------------|---------|--------|-------|-------|
| A_55_P2062727 | Nasp    | 50927  | -1.25 | 0.006 |
| A_52_P520940  | Taf7    | 24074  | -1.25 | 0.084 |
| A_55_P2072443 | Kansl1  | 76719  | -1.25 | 0.084 |
| A_55_P2078765 | Mll5    | 69188  | -1.27 | 0.008 |
| A_52_P241544  | Supt7l  | 72195  | -1.28 | 0.023 |
| A_66_P128997  | Pml     | 18854  | -1.29 | 0.003 |
| A_55_P1981724 | Nr2c1   | 22025  | -1.31 | 0.012 |
| A_55_P1994052 | Asxl1   | 228790 | -1.40 | 0.007 |
| A_55_P2066329 | Med28   | 66999  | -1.41 | 0.326 |
| A_52_P154880  | Ing3    | 71777  | -1.46 | 0.014 |
| A_66_P119170  | Phf21a  | 192285 | -1.47 | 0.007 |
| A_55_P1976278 | Prkcb   | 18751  | -1.58 | 0.006 |
| A_55_P2163837 | Med14   | 26896  | -1.73 | 0.006 |
| A_52_P406371  | Med14   | 26896  | -1.84 | 0.006 |
| A_51_P137094  | Sall2   | 50524  | -1.95 | 0.060 |
| A_66_P136955  | Med14   | 26896  | -2.06 | 0.005 |
| A_52_P87843   | Aldh1a3 | 56847  | -4.73 | 0.004 |



Table S3. Counts of spermatogonia versus Sertoli cells during the seminiferous epithelial cycle

| stage  | <i>Gfra1+</i>                   |               |                                 | <i>Ngn3+</i>                    |               |                                 |
|--------|---------------------------------|---------------|---------------------------------|---------------------------------|---------------|---------------------------------|
|        | spermatogonia<br>(n = 7 testes) | Sertoli cells | spermatogonia/<br>Sertoli cells | spermatogonia<br>(n = 5 testes) | Sertoli cells | spermatogonia/<br>Sertoli cells |
| I      | 105                             | 2675          | 0.0393                          | 47                              | 3019          | 0.0156                          |
| II-III | 60                              | 1486          | 0.0404                          | 54                              | 1608          | 0.0336                          |
| IV     | 42                              | 1597          | 0.0263                          | 125                             | 1737          | 0.0720                          |
| V      | 73                              | 1905          | 0.0383                          | 121                             | 2238          | 0.0541                          |
| VI     | 34                              | 1246          | 0.0273                          | 116                             | 1507          | 0.0770                          |
| VII    | 120                             | 2612          | 0.0459                          | 208                             | 2749          | 0.0757                          |
| VIII   | 39                              | 1153          | 0.0338                          | 48                              | 1086          | 0.0442                          |
| IX     | 63                              | 1282          | 0.0491                          | 58                              | 1399          | 0.0415                          |
| X      | 36                              | 891           | 0.0404                          | 38                              | 1006          | 0.0378                          |
| XI     | 59                              | 1025          | 0.0576                          | 33                              | 1158          | 0.0285                          |
| XII    | 82                              | 1592          | 0.0515                          | 11                              | 1736          | 0.0063                          |

Total counts from seven (*Gfra1*) or five (*Ngn3*) testis sections probed with *Gfra1* and *Ngn3*.
